# Supplementary material
Source: MDPI journal article supplement (https://www.mdpi.com/1424-2818/15/3/351)
Supplement: s1 [file s1]

**Table S1.** Spider species composition and habitat distribution in the Velykoburlutskyi Steppe Regional Landscape Park (2003, 2008, 2012–2019)

| Taxon                                                    | Habitats |     |    |    |    |      |    |    |    |    |    |
|----------------------------------------------------------|----------|-----|----|----|----|------|----|----|----|----|----|
|                                                          | Ugb      | UgS | GB | GS | AS | OUgS | FE | BF | FM | WB | HD |
| Fam. AGELENIDAE 3                                        |          |     |    |    |    |      |    |    |    |    |    |
| <i>Agelena labyrinthica</i> (Clerck, 1757)               | 1        | 1   | .  | .  | .  | 1    | 1  | 1  | .  | .  | .  |
| <i>Tegenaria domestica</i> (Clerck, 1757)                | .        | .   | .  | .  | .  | .    | .  | .  | .  | .  | 1  |
| <i>Tegenaria lapicidinarum</i> Spassky, 1934             | 1        | .   | .  | .  | .  | 1    | 1  | 1  | .  | .  | 1  |
| Fam. ARANEIDAE 16                                        |          |     |    |    |    |      |    |    |    |    |    |
| <i>Agalenatea redii</i> (Scopoli, 1763)                  | 1        | 1   | 1  | 1  | 1  | 1    | 1  | .  | 1  | .  | .  |
| <i>Araneus angulatus</i> Clerck, 1757                    | .        | .   | .  | .  | .  | .    | .  | 1  | .  | .  | .  |
| <i>Araneus diadematus</i> Clerck, 1757                   | 1        | .   | .  | .  | .  | .    | 1  | 1  | .  | 1  | 1  |
| <i>Araneus quadratus</i> Clerck, 1757                    | 1        | .   | .  | .  | .  | .    | 1  | .  | 1  | 1  | .  |
| <i>Araniella cucurbitina</i> (Clerck, 1757)              | .        | .   | .  | .  | .  | .    | 1  | .  | .  | .  | .  |
| <i>Argiope bruennichi</i> (Scopoli, 1772)                | 1        | .   | 1  | .  | 1  | 1    | 1  | .  | 1  | 1  | .  |
| <i>Cercidia prominens</i> (Westring, 1851)               | 1        | 1   | .  | .  | 1  | 1    | 1  | 1  | 1  | .  | .  |
| <i>Cyclosa conica</i> (Pallas, 1772)                     | 1        | .   | .  | .  | .  | .    | 1  | 1  | .  | 1  | .  |
| <i>Cyclosa oculata</i> (Walckenaer, 1802)                | .        | 1   | .  | .  | .  | 1    | .  | .  | .  | .  | .  |
| <i>Hypsosinga sanguinea</i> (C. L. Koch, 1844)           | 1        | 1   | .  | 1  | 1  | 1    | 1  | .  | 1  | .  | .  |
| <i>Larinioides ixobolus</i> (Thorell, 1873)              | .        | .   | .  | .  | .  | .    | .  | .  | .  | .  | 1  |
| <i>Larinioides patagiatus</i> (Clerck, 1757)             | .        | .   | .  | .  | .  | .    | .  | .  | 1  | 1  | 1  |
| <i>Larinioides suspicax</i> (O. Pickard-Cambridge, 1876) | .        | .   | 1  | .  | .  | .    | 1  | .  | 1  | .  | .  |
| <i>Mangora acalypha</i> (Walckenaer, 1802)               | 1        | 1   | 1  | 1  | 1  | 1    | 1  | 1  | 1  | 1  | 1  |
| <i>Neoscona adianta</i> (Walckenaer, 1802)               | 1        | 1   | 1  | 1  | 1  | 1    | 1  | .  | 1  | .  | .  |
| <i>Singa nitidula</i> C. L. Koch, 1844                   | .        | .   | .  | .  | .  | .    | .  | .  | .  | 1  | .  |
| Fam. ATYPIDAE 1                                          |          |     |    |    |    |      |    |    |    |    |    |
| <i>Atypus muralis</i> Bertkau, 1890                      | .        | 1   | .  | .  | .  | .    | .  | .  | .  | .  | .  |
| Fam. CHEIRACANTIIDAE 5                                   |          |     |    |    |    |      |    |    |    |    |    |
| <i>Cheiracanthium elegans</i> Thorell, 1875              | .        | .   | .  | .  | .  | .    | 1  | .  | .  | .  | .  |
| <i>Cheiracanthium erraticum</i> (Walckenaer, 1802)       | .        | .   | .  | .  | .  | .    | 1  | .  | 1  | .  | .  |
| <i>Cheiracanthium pennyi</i> O. Pickard-Cambridge, 1873  | 1        | 1   | .  | 1  | 1  | 1    | 1  | .  | 1  | .  | .  |
| <i>Cheiracanthium punctorium</i> (Villers, 1789)         | 1        | .   | .  | .  | .  | .    | 1  | .  | 1  | 1  | .  |
| <i>Cheiracanthium virescens</i> (Sundevall, 1833)        | 1        | 1   | 1  | .  | 1  | 1    | 1  | .  | .  | .  | .  |
| Fam. CLUBIONIDAE 6                                       |          |     |    |    |    |      |    |    |    |    |    |
| <i>Clubiona caerulescens</i> L. Koch, 1867               | .        | .   | .  | .  | .  | .    | .  | 1  | .  | 1  | .  |

| Taxon                                                | Habitats |     |    |    |    |      |    |    |    |    |    |
|------------------------------------------------------|----------|-----|----|----|----|------|----|----|----|----|----|
|                                                      | Ugb      | UgS | GB | GS | AS | OUgS | FE | BF | FM | WB | HD |
| <i>Clubiona neglecta</i> O. Pickard-Cambridge, 1862  | 1        | .   | .  | .  | .  | .    | .  | .  | 1  | .  | .  |
| <i>Clubiona pallidula</i> (Clerck, 1757)             | .        | .   | .  | .  | .  | .    | .  | 1  | .  | .  | .  |
| <i>Clubiona pseudoneglecta</i> Wunderlich, 1994      | .        | .   | .  | .  | .  | 1    | .  | .  | 1  | .  | .  |
| <i>Clubiona phragmitis</i> C. L. Koch, 1843          | .        | .   | .  | .  | .  | .    | .  | .  | .  | 1  | .  |
| <i>Clubiona subtilis</i> L. Koch, 1867               | .        | .   | .  | .  | .  | .    | .  | .  | 1  | .  | .  |
| Fam. DICTYNIDAE 5                                    |          |     |    |    |    |      |    |    |    |    |    |
| <i>!Argenna subnigra</i> (O. Pickard-Cambridge, 1861 | 1        | 1   | .  | .  | .  | 1    | .  | .  | .  | .  | .  |
| <i>!!Altella hungarica</i> Loksa, 1981               | .        | 1   | .  | 1  | 1  | .    | .  | .  | .  | .  | .  |
| <i>!!Argenna patula</i> (Simon, 1874)                |          |     |    |    | 1  |      |    |    |    |    |    |
| <i>Dictyna arundinacea</i> (Linnaeus, 1758)          | 1        | 1   | 1  | 1  | 1  | 1    | 1  |    | 1  | 1  | .  |
| <i>Dictyna uncinata</i> Thorell, 1856                | 1        | .   | .  | .  | .  | .    | 1  | 1  | 1  | 1  | .  |
| Fam. DYSDERIDAE 1                                    |          |     |    |    |    |      |    |    |    |    |    |
| <i>Dysdera</i> sp. juv.                              | .        | .   | .  | .  | .  | .    | .  | .  | .  | .  | 1  |
| Fam. ERESIDAE 1                                      |          |     |    |    |    |      |    |    |    |    |    |
| <i>*!Eresus kollari</i> Rossi, 1846                  | .        | .   | 1  | .  | 1  | .    | .  | .  | .  | .  | .  |
| Fam. GNAPHOSIDAE 33                                  |          |     |    |    |    |      |    |    |    |    |    |
| <i>Berlandina cinerea</i> (Menge, 1872)              | .        | 1   | .  | 1  | .  | 1    | .  | .  | .  | .  | .  |
| <i>Callilepis nocturna</i> (Linnaeus, 1758)          | 1        | 1   | .  | 1  | .  | 1    | 1  | .  | .  | .  | .  |
| <i>!Civizelotes pygmaeus</i> (Miller, 1943)          | 1        | 1   | 1  | 1  | 1  | 1    | .  | .  | .  | .  | .  |
| <i>Drassodes pubescens</i> (Thorell, 1856)           | .        | 1   | 1  | .  | 1  | 1    | 1  | 1  | 1  | 1  | .  |
| <i>Drassyllus lutetianus</i> (L. Koch, 1866)         | 1        | 1   | 1  | 1  | 1  | 1    | 1  | .  | 1  | .  | .  |
| <i>Drassyllus praeficus</i> (L. Koch, 1866)          | 1        | 1   | 1  | 1  | 1  | 1    | 1  | .  | 1  | .  | .  |
| <i>!Drassyllus vinealis</i> (Kulczyn'ski, 1897)      | .        | 1   | .  | 1  | .  | 1    | .  | .  | 1  | .  | .  |
| <i>!Gnaphosa dolosa</i> O. Herman, 1879              | 1        | 1   |    | .  | .  | 1    | 1  | .  | .  | .  | .  |
| <i>Gnaphosa leporina</i> (L. Koch, 1866)             | .        | 1   | 1  | .  | .  | .    | .  | .  | .  | .  | .  |
| <i>!Gnaphosa licenti</i> Schenkel, 1953              | .        | 1   | 1  | 1  | 1  | 1    | 1  | .  | .  | .  | .  |
| <i>Gnaphosa lucifuga</i> (Walckenaer, 1802)          | .        | 1   | .  | 1  | 1  | 1    | .  | .  | .  | .  | .  |
| <i>*!Gnaphosa lugubris</i> (C. L. Koch, 1839)        | 1        | 1   | 1  | 1  | 1  | 1    | 1  | .  | 1  | .  | .  |
| <i>Haplodrassus dalmatensis</i> (L. Koch, 1866)      | .        | 1   | 1  | .  | .  | 1    | .  | .  | .  | .  | .  |
| <i>Haplodrassus kulczynskii</i> Lohmander, 1942      | 1        | 1   | 1  | 1  | 1  | 1    | .  | .  | .  | .  | .  |
| <i>Haplodrassus signifer</i> (C. L. Koch, 1839)      | 1        | 1   | 1  | 1  | .  | 1    | 1  | 1  | 1  | 1  | .  |
| <i>Haplodrassus silvestris</i> (Blackwall, 1833)     | .        | .   | .  | .  | 1  | .    | 1  | 1  | .  | .  | .  |

| Taxon                                             | Habitats |     |    |    |    |      |    |    |    |    |    |
|---------------------------------------------------|----------|-----|----|----|----|------|----|----|----|----|----|
|                                                   | Ugb      | UgS | GB | GS | AS | OUgS | FE | BF | FM | WB | HD |
| <i>Haplodrassus umbratilis</i> (L. Koch, 1866)    | 1        | .   | .  | .  | .  | .    | 1  | 1  | 1  | .  | .  |
| <i>Micaria dives</i> (Lucas, 1846)                | .        | 1   | .  | .  | .  | .    | .  | .  | .  | .  | .  |
| <i>Micaria formicaria</i> (Sundevall, 1831)       | 1        | 1   | 1  | 1  | 1  | 1    | 1  | .  | .  | .  | .  |
| <i>Micaria fulgens</i> (Walckenaer, 1802)         | 1        | .   | .  | 1  | .  | .    | 1  | .  | 1  | .  | .  |
| <i>Micaria pulicaria</i> (Sundevall, 1831)        | .        | .   | .  | .  | 1  | .    | .  | .  | .  | .  | .  |
| ! <i>Micaria rossica</i> Thorell, 1875            | .        | .   | .  | .  | 1  | .    | .  | .  | .  | .  | .  |
| !! <i>Micaria silesiaca</i> L. Koch, 1875         | .        | .   | .  | .  | .  | .    | .  | .  | 1  | .  | .  |
| <i>Poecilochroa variana</i> (C. L. Koch, 1839)    | 1        | 1   | 1  | 1  | 1  | 1    | 1  | 1  | .  | .  | .  |
| <i>Scotophaeus quadripunctatus</i> (L.)           | .        | .   | .  | .  | .  | .    | .  | 1  | .  | .  | .  |
| <i>Trachyzelotes pedestris</i> (C. L. Koch, 1837) | .        | 1   | .  | .  | .  | .    | .  | .  | .  | .  | .  |
| <i>Zelotes azsheganovae</i> Esyunin, Efimik, 1992 | .        | .   | .  | .  | .  | .    | .  | 1  | .  | .  | .  |
| <i>Zelotes electus</i> (C. L. Koch, 1839)         | 1        | 1   | 1  | 1  | 1  | 1    | 1  | .  | 1  | .  | .  |
| <i>Zelotes fuscus</i> (Thorell, 1875)             | 1        | .   | .  | .  | .  | .    | 1  | 1  | .  | .  | .  |
| <i>Zelotes latreillei</i> (Simon, 1878)           | 1        | .   | .  | 1  | 1  | .    | 1  | 1  | 1  | .  | .  |
| <i>Zelotes longipes</i> (L. Koch, 1866)           | 1        | 1   | 1  | 1  | 1  | 1    | 1  | .  | 1  | .  | .  |
| ! <i>Zelotes mundus</i> (Kulczyn'ski, 1897)       | .        | .   | .  | 1  | .  | .    | .  | .  | .  | .  | .  |
| ! <i>Zelotes segrex</i> (Simon, 1878)             | .        | .   | .  | .  | .  | 1    | .  | .  | .  | .  | .  |
| Fam. HAHNIIDAE 2                                  |          |     |    |    |    |      |    |    |    |    |    |
| <i>Hahnia ononidum</i> Simon, 1875                | .        | .   | .  | .  | .  | .    | .  | 1  | .  | .  | .  |
| <i>Hahnia nava</i> (Blackwall, 1841)              | 1        | .   | 1  | 1  | 1  | 1    | .  | .  | .  | .  | .  |
| Fam. LINYPHIIDAE 34                               |          |     |    |    |    |      |    |    |    |    |    |
| <i>Abacoproeces saltuum</i> (L. Koch, 1872)       | .        | .   | .  | .  | .  | .    | 1  | 1  | .  | .  | .  |
| !! <i>Agyneta fuscipalpa</i> (C. L. Koch, 1836)   | .        | .   | 1  | .  | .  | .    | .  | .  | .  | .  | .  |
| <i>Agyneta rurestris</i> (C. L. Koch, 1836)       | 1        | 1   | .  | .  | 1  | 1    | 1  | .  | 1  | .  | .  |
| !! <i>Agyneta saaristoi</i> Tanasevitch, 2000     | 1        | .   | 1  | 1  | .  | .    | .  | .  | 1  | .  | .  |
| <i>Agyneta simplicatarsis</i> (Simon, 1884)       | .        | .   | .  | 1  | 1  | .    | .  | .  | .  | .  | .  |
| <i>Bathyphantes nigrinus</i> (Westring, 1851)     | .        | .   | .  | .  | .  | .    | .  | .  | .  | 1  | .  |
| <i>Centromerus incilium</i> (L. Koch, 1881)       | 1        | .   | .  | .  | 1  | .    | .  | .  | .  | .  | .  |
| <i>Ceratinella brevis</i> (Wider, 1834)           | 1        | .   | .  | .  | .  | .    | 1  | 1  | .  | .  | .  |
| <i>Dicymbium nigrum</i> (Blackwall, 1834)         | .        | .   | .  | .  | .  | .    | .  | .  | .  | 1  | .  |
| <i>Diplocephalus picinus</i> (Blackwall, 1841)    | .        | .   | .  | .  | .  | .    | .  | 1  | .  | .  | .  |
| <i>Diplostyla concolor</i> (Wider, 1834)          | 1        | .   | 1  | .  | .  | .    | .  | 1  | 1  | 1  | .  |
| !! <i>Ipa terrens</i> (L. Koch, 1879)             | .        | .   | .  | 1  | 1  | 1    | .  | .  | .  | .  | .  |

| Taxon                                                         | Habitats |     |    |    |    |      |    |    |    |    |    |
|---------------------------------------------------------------|----------|-----|----|----|----|------|----|----|----|----|----|
|                                                               | Ugb      | UgS | GB | GS | AS | OUgS | FE | BF | FM | WB | HD |
| <i>Kaestneria pullata</i> (O. Pickard-Cambridge, 1863)        | .        | .   | .  | .  | .  | .    | .  | .  | .  | 1  | .  |
| <i>Linyphia hortensis</i> Sundevall, 1830                     | .        | .   | .  | .  | .  | .    | .  | 1  | .  | 1  | .  |
| <i>Linyphia tenuipalpis</i> Simon, 1884                       | 1        | .   | .  | .  | .  | 1    | 1  | .. | .  | 1  | .  |
| <i>Linyphia triangularis</i> (Clerck, 1757)                   | 1        | .   | .  | .  | .  | 1    | 1  | 1  | 1  | 1  | .  |
| <i>Maso sundevalli</i> (Westring, 1851)                       | 1        | .   | .  | .  | .  | .    | .  | 1  | .  | .  | .  |
| <i>Micrargus subaequalis</i> (Westring, 1851)                 | .        | .   | .  | .  | .  | 1    | .  | .  | .  | .  | .  |
| <i>Microlinyphia pusilla</i> (Sundevall, 1830)                | 1        | .   | .  | .  | .  | 1    | 1  | .  | 1  | 1  | .  |
| <i>Microneta viaria</i> (Blackwall, 1841)                     | .        | .   | .  | .  | .  | .    | .  | 1  | .  | .  | .  |
| <i>Neriere clathrata</i> (Sundevall, 1830)                    | 1        | .   | .  | .  | .  | .    | .  | 1  | 1  | 1  | .  |
| <i>Neriere radiata</i> (Walckenaer, 1841)                     | .        | .   | .  | .  | .  | .    | .  | 1  | .  | 1  | .  |
| <i>Panamomops mengei</i> Simon, 1926                          | .        | .   | .  | .  | .  | .    | .  | 1  | .  | .  | .  |
| <i>Pocadicnemis pumila</i> (Blackwall, 1841)                  | .        | .   | .  | .  | .  | .    | .  | .  | 1  | .  | .  |
| <i>Porrhomma microphthalmum</i> (O. Pickard-Cambridge, 1871)  | .        | 1   | .  | 1  | 1  | .    | .  | .  | .  | .  | .  |
| <i>Stemonyphantes lineatus</i> (Linnaeus, 1758)               | 1        | 1   | 1  | 1  | 1  | 1    | 1  | .  | 1  | .  | .  |
| <i>Styloctector romanus</i> (O. Pickard-Cambridge, 1872)      | .        | 1   | .  | 1  | .  | 1    | .  | .  | .  | .  | .  |
| <i>Tenuiphantes flavipes</i> (Blackwall, 1854)                | .        | .   | .  | .  | .  | .    | .  | 1  | .  | .  | .  |
| <i>Trematocephalus cristatus</i> (Wider, 1834)                | .        | .   | .  | .  | .  | .    | .  | 1  | .  | .  | .  |
| <i>Trichoncus affinis</i> Kulczyn'ski 1894                    | 1        | 1   | 1  | 1  | 1  | 1    | 1  | 1  | .  | .  | .  |
| <i>Trichopterna cito</i> (O. Pickard-Cambridge, 1872)         | .        | .   | .  | .  | .  | 1    | .  | .  | .  | .  | .  |
| <i>Walckenaeria alticeps</i> (Denis, 1952)                    | .        | .   | .  | .  | .  | .    | .  | 1  | .  | .  | .  |
| <i>Walckenaeria atrotibialis</i> (O. Pickard-Cambridge, 1878) | 1        | .   | .  | .  | .  | .    | .  | 1  | 1  | .  | .  |
| <i>Walckenaeria furcillata</i> (Menge, 1869)                  | .        | .   | .  | .  | .  | .    | .  | 1  | .  | .  | .  |
| Fam. LIOCRANIDAE 5                                            |          |     |    |    |    |      |    |    |    |    |    |
| <i>Agroeca brunnea</i> (Blackwall, 1833)                      | .        | .   | .  | .  | .  | .    | 1  | 1  | .  | .  | .  |
| <i>Agroeca cuprea</i> Menge, 1873                             | 1        | 1   | 1  | .  | 1  | 1    | 1  | .  | 1  | .  | .  |
| <i>Agroeca lusatica</i> (L. Koch, 1875)                       | 1        | 1   | 1  | .  | 1  | .    | 1  | .  | 1  | .  | .  |
| <i>!!Agroeca makarovae</i> Esyunin, 2008                      | .        | 1   | .  | .  | .  | .    | .  | .  | .  | .  | .  |
| <i>Liocranoeca striata</i> (Kulczyński, 1882)                 | .        | .   | .  | .  | .  | .    | .  | 1  | .  | .  | .  |
| Fam. LYCOSIDAE 27                                             |          |     |    |    |    |      |    |    |    |    |    |
| <i>Alopecosa cuneata</i> (Clerck, 1757)                       | 1        | 1   | 1  | 1  | 1  | 1    | 1  | .  | 1  | 1  | .  |

| Taxon                                         | Habitats |     |    |    |    |      |    |    |    |    |    |
|-----------------------------------------------|----------|-----|----|----|----|------|----|----|----|----|----|
|                                               | Ugb      | UgS | GB | GS | AS | OUgS | FE | BF | FM | WB | HD |
| <i>Alopecosa cursor</i> (Hahn, 1831)          |          | 1   | 1  | 1  | 1  | 1    |    | .  | .  | .  | .  |
| <i>Alopecosa farinosa</i> (Herman, 1879)      | 1        | 1   | 1  | 1  | 1  | 1    | 1  | .  | 1  | .  | .  |
| <i>Alopecosa pulverulenta</i> (Clerck, 1757)  | 1        | 1   | 1  | 1  | 1  | 1    | 1  | .  | 1  | .  | .  |
| <i>Alopecosa schmidtii</i> (Hahn, 1835)       | 1        | 1   | 1  | 1  | 1  | 1    | 1  | .  | .  | .  | .  |
| <i>Alopecosa solitaria</i> (Herman, 1879)     | 1        | 1   | 1  | 1  | 1  | 1    | 1  | .  | .  | .  | .  |
| <i>Alopecosa taeniopus</i> (Kulczyński, 1895) | .        | .   | 1  | 1  | 1  | 1    | 1  | .  | .  | .  | .  |
| <i>Alopecosa trabalis</i> (Clerck, 1757)      | .        | .   | .  | .  | .  | .    | 1  | 1  | .  | .  | .  |
| <i>Arctosa leopardus</i> (Sundevall, 1833)    | .        | .   | .  | .  | .  | .    | .  | .  | 1  | .  | .  |
| <i>Arctosa lutetiana</i> (Simon, 1876)        | 1        | .   | .  | .  | .  | .    | 1  | 1  | .  | .  | .  |
| <i>Pardosa agrestis</i> (Westring, 1861)      | .        | .   | 1  | 1  | .  | .    | 1  |    | 1  | .  | .  |
| <i>Pardosa alacris</i> (C. L. Koch, 1833)     | .        | .   | .  | .  | .  | .    | 1  | 1  | 1  | .  | .  |
| <i>Pardosa fulvipes</i> (Collet, 1876)        | .        | .   | .  | .  | .  | .    | 1  | .  | 1  | .  | .  |
| <i>Pardosa lugubris</i> (Walckenaer, 1802)    | 1        | .   | .  | .  | .  | 1    | 1  | 1  | 1  | 1  | .  |
| <i>!!Pardosa maisa</i> Hippa & Mannila, 1982  | 1        | .   | .  | .  | .  | .    | .  | .  | 1  | .  | .  |
| <i>Pardosa paludicola</i> (Clerck, 1757)      | .        | .   | .  | .  | .  | .    | .  | .  | 1  | .  | .  |
| <i>Pardosa palustris</i> (Linnaeus, 1758)     | .        | .   | .  | .  | .  | .    | 1  | .  | 1  | .  | .  |
| <i>Pardosa prativaga</i> (L. Koch, 1870)      | .        | .   | .  | .  | .  | .    | 1  | .  | 1  | 1  | .  |
| <i>Pardosa pullata</i> (Clerck, 1757)         | .        | .   | .  | .  | .  | .    | .  | .  | 1  | 1  | .  |
| <i>Pirata piraticus</i> (Clerck, 1757)        |          | .   | .  | .  |    |      |    |    | .  | 1  | .  |
| <i>Pirata piscatorius</i> (Clerck, 1757)      | .        | .   | .  | .  | .  | .    | .  | .  | .  | 1  | .  |
| <i>Piratula hygrophila</i> (Thorell, 1872)    | .        | .   | .  | .  | .  | .    | .  | 1  | 1  | 1  | .  |
| <i>Piratula latitans</i> (Blackwall, 1841)    | .        | .   | .  | .  | .  | .    | .  | .  | 1  | .  | .  |
| <i>Trochosa robusta</i> (Simon, 1876)         | 1        | 1   | 1  | 1  | 1  | 1    | 1  | .  | .  | .  | .  |
| <i>Trochosa ruricola</i> (De Geer, 1778)      | 1        |     | 1  | 1  | 1  | .    | 1  | 1. | 1  | 1  | .  |
| <i>Trochosa terricola</i> Thorell, 1856       | 1        | 1   | 1  | .  | .  | 1    | 1  | 1  | 1  | 1  | .  |
| <i>Xerolycosa miniata</i> (C. L. Koch, 1834)  | 1        | 1   | 1  | 1  | 1  | 1    | 1  | .  | 1  | 1  | .  |
| Fam. MIMETIDAE 1                              |          |     |    |    |    |      |    |    |    |    |    |
| <i>Ero furcata</i> (Villers, 1789)            | 1        | .   | .  | .  | .  | .    | .  | 1  | .  | .  | .  |
| Fam. MITURGIDAE 3                             |          |     |    |    |    |      |    |    |    |    |    |
| <i>!Zora pardalis</i> Simon, 1878             | 1        | 1   | .  | .  | .  | 1    | 1  | .  | 1  | .  | .  |
| <i>Zora silvestris</i> Kulczyński, 1897       |          |     |    |    |    |      | 1  | 1  | .  | .  | .  |
| <i>Zora spinimana</i> (Sundevall, 1833)       | 1        | .   | 1  | .  | .  | .    | 1  | .  | 1  | .  | .  |
| Fam. PHILODROMIDAE 9                          |          |     |    |    |    |      |    |    |    |    |    |
| <i>Philodromus aureolus</i> (Clerck, 1757)    | .        | .   | .  | .  | .  | .    | 1  | .  | .  | .  | .  |

| Taxon                                               | Habitats |     |    |    |    |      |    |    |    |    |    |
|-----------------------------------------------------|----------|-----|----|----|----|------|----|----|----|----|----|
|                                                     | Ugb      | UgS | GB | GS | AS | OUgS | FE | BF | FM | WB | HD |
| <i>Philodromus cespitum</i> (Walckenaer, 1802)      | 1        | 1   | .  | .  | 1  | .    | 1  | 1  | 1  | .  | 1  |
| <i>Rhysodromus histrio</i> (Latreille, 1819)        | .        | 1   | .  | .  | 1  | .    | .  | .  | .  | .  | .  |
| <i>Thanatus arenarius</i> L. Koch, 1872             | 1        | 1   | 1  | 1  | 1  | 1    | 1  | .  | .  | .  | .  |
| <i>Thanatus formicinus</i> (Clerck, 1757)           | .        | .   | 1  | .  | .  | .    | .  | .  | .  | .  | .  |
| <i>!Thanatus oblongiusculus</i> (Lucas, 1846)       | .        | 1   | .  | .  | 1  | 1    | .  | .  | .  | .  | .  |
| <i>Thanatus sabulosus</i> (Menge, 1875)             | 1        | .   | .  | .  | .  | .    | 1  | 1  | .  | .  | .  |
| <i>Tibellus macellus</i> Simon, 1875                | .        | 1   | .  | 1  | 1  | 1    | .  | .  | .  | .  | .  |
| <i>Tibellus oblongus</i> (Walckenaer, 1802)         | 1        | .   | 1  | 1  | 1  | 1    | 1  | .  | 1  | 1  | .  |
| Fam. PHOLCIDAE 1                                    |          |     |    |    |    |      |    |    |    |    |    |
| <i>Pholcus ponticus</i> Thorell, 1875               | .        | .   | .  | .  | .  | .    | .  | .  | .  | .  | 1  |
| Fam. PHRUROLITHIDAE 2                               |          |     |    |    |    |      |    |    |    |    |    |
| <i>Phrurolithus festivus</i> (C. L. Koch, 1835)     | 1        | .   | 1  | .  | 1  | 1    | 1  | 1  | 1  | .  | .  |
| <i>Phrurolithus pullatus</i> Kulczyński, 1897       | 1        | 1   | 1  | 1  | 1  | 1    | .  | .  | .  | .  | .  |
| Fam. PISAURIDAE 1                                   |          |     |    |    |    |      |    |    |    |    |    |
| <i>Pisaura novicia</i> (L. Koch, 1878)              | 1        | .   | .  | .  | .  | 1    | 1  | 1  | 1  | 1  | .  |
| Fam. SALTICIDAE 21                                  |          |     |    |    |    |      |    |    |    |    |    |
| <i>!!Aelurillus laniger</i> Logunov & Marusik, 2000 | .        | 1   | .  | .  | .  | 1    | .  | .  | .  | .  | .  |
| <i>Aelurillus v-insignitus</i> (Clerck, 1757)       | .        | 1   | .  | 1  | 1  | 1    | .  | .  | .  | .  | .  |
| <i>Asianellus festivus</i> (C. L. Koch, 1834)       | .        | 1   | .  | .  | .  | 1    | .  | .  | .  | .  | .  |
| <i>Attulus zimmermanni</i> (Simon, 1877)            | 1        | .   | .  | .  | .  | .    | 1  | 1  | .  | .  | .  |
| <i>!!Chalcoscirtus nigrinus</i> (Thorell, 1875)     | .        | .   | .  | .  | .  | 1    | .  | .  | .  | .  | .  |
| <i>Euophrys frontalis</i> (Walckenaer, 1802)        | 1        | 1   | 1  | 1  | 1  | 1    | 1  | .  | .  | .  | .  |
| <i>Evarcha arcuata</i> (Clerck, 1757)               | 1        | .   | .  | .  | 1  | 1    | 1  | .  | 1  | 1  | .  |
| <i>Evarcha falcata</i> (Clerck, 1757)               |          |     |    |    |    |      | 1  | 1  | 1  | 1  | .  |
| <i>Evarcha michailovi</i> Logunov, 1992             | 1        | .   | .  | .  | .  | 1    | 1  | .  | 1  | .  | .  |
| <i>Heliophanus auratus</i> C. L. Koch, 1835         | .        | .   | .  | .  | .  | .    | 1  | .  | 1  | 1  | .  |
| <i>Heliophanus cupreus</i> (Walckenaer, 1802)       | 1        | .   | 1  | .  | .  | .    | 1  | 1  | 1  | 1  | .  |
| <i>Heliophanus flavipes</i> (Hahn, 1832)            | 1        | 1   | 1  | 1  | 1  | 1    | 1  | .  | 1  | .  | .  |
| <i>Marpissa muscosa</i> (Clerck, 1757)              | .        | .   | .  | .  | .  | .    | .  | 1  | .  | .  | .  |
| <i>Myrmarachne formicaria</i> (De Geer, 1778)       | .        | .   | .  | .  | .  | 1    | .  | .  | 1  | .  | .  |
| <i>Phlegra fasciata</i> (Hahn, 1826)                | 1        | 1   | 1  | 1  | 1  | 1    | 1  | .  | .  | .  | .  |

| Taxon                                                 | Habitats |     |    |    |    |      |    |    |    |    |    |
|-------------------------------------------------------|----------|-----|----|----|----|------|----|----|----|----|----|
|                                                       | Ugb      | UgS | GB | GS | AS | OUgS | FE | BF | FM | WB | HD |
| <i>Pseudeuophrys obsoleta</i> (Simon, 1868)           | .        | .   | .  | .  | 1  | .    | .  | .  | .  | .  | .  |
| <i>Sibianor aurocinctus</i> (Ohlert, 1865)            | .        | .   | .  | .  | .  | 1    | .  | .  | .  | .  | .  |
| <i>Synageles subcingulatus</i> (Simon, 1878)          | .        | 1   | .  | .  | .  | .    | 1  | .  | .  | .  | .  |
| <i>Talavera aequipes</i> (O. Pickard-Cambridge, 1871) | 1        | .   | 1  | .  | 1  | 1    | .  | .  | .  | .  | .  |
| ! <i>Talavera aperta</i> (Miller, 1971)               | 1        | .   | .  | .  | .  | .    | .  | .  | 1  | .  | .  |
| ! <i>Talavera petrensis</i> (C. L. Koch, 1837)        | .        | 1   | .  | 1  | .  | 1    | .  | .  | .  | .  | .  |
| Fam. SPARASSIDAE 1                                    |          |     |    |    |    |      |    |    |    |    |    |
| <i>Micrommata virescens</i> (Clerck, 1757)            | 1        | .   | .  | .  | .  | 1    | 1  | 1  | 1  | .  | .  |
| Fam. TETRAGANTHIDAE 5                                 |          |     |    |    |    |      |    |    |    |    |    |
| <i>Metellina segmentata</i> (Clerck, 1757)            | .        | .   | .  | .  | .  | .    | 1  | 1  | .  | 1  | .  |
| <i>Pachygnatha clercki</i> Sundevall, 1823            | .        | .   | .  | .  | .  | .    | .  | .  | 1  | 1  | .  |
| <i>Pachygnatha degeeri</i> Sundevall, 1830            | 1        | .   | 1  | .  | .  | .    | .  | .  | 1  | .  | .  |
| <i>Pachygnatha listeri</i> Sundevall, 1830            | .        | .   | .  | .  | .  | .    | 1  | 1  | 1  | 1  | .  |
| <i>Tetragnatha montana</i> Simon, 1874                | .        | .   | .  | .  | .  | .    | .  | 1  | 1  | 1  | .  |
| Fam. THERIDIIDAE 21                                   |          |     |    |    |    |      |    |    |    |    |    |
| <i>Asagena phalerata</i> (Panzer, 1801)               | 1        | 1   | 1  | 1  | 1  | 1    | 1  | .  | .  | .  | .  |
| <i>Crustulina guttata</i> (Wider, 1834)               | 1        | 1   | .  | .  | .  | .    | .  | 1  | .  | .  | .  |
| <i>Enoplognatha latimana</i> Hippa et Oksala          | 1        | .   | .  | .  | .  | 1    | .  | .  | .  | .  | .  |
| <i>Enoplognatha ovata</i> (Clerck, 1757)              | 1        | .   | .  | .  | .  | 1    | 1  | 1  | 1  | 1  | .  |
| <i>Enoplognatha thoracica</i> (Hahn, 1833)            | .        | .   | .  | .  | 1  | .    | .  | 1  | .  | .  | .  |
| <i>Episinus angulatus</i> (Blackwall, 1836)           | .        | .   | .  | .  | .  | .    | .  | 1  | .  | .  | .  |
| <i>Euryopsis flavomaculata</i> (C. L. Koch, 1836)     | .        | .   | .  | .  | .  | .    | 1  | 1  | .  | .  | .  |
| ! <i>Euryopsis quinqueguttata</i> Thorell, 1875       | .        | .   | .  | .  | 1  | .    | 1  | .  | .  | .  | .  |
| !! <i>Laseola coracina</i> (C. L. Koch, 1837)         | .        | .   | .  | .  | .  | 1    | .  | .  | .  | .  | .  |
| <i>Neottiura bimaculata</i> (Linnaeus, 1767)          | 1        | .   | .  | .  | 1  | .    | 1  | 1  | 1  | 1  | .  |
| <i>Parasteatoda lunata</i> (Clerck, 1757)             | .        | .   | .  | .  | .  | .    | .  | 1  | .  | .  | .  |
| <i>Parasteatoda tabulata</i> Levi, 1980               | .        | .   | .  | .  | .  | .    | .  | .  | .  | .  | .  |
| <i>Parasteatoda tepidariorum</i> (C. L. Koch, 1841)   | .        | .   | .  | .  | .  | .    | .  | .  | .  | .  | .  |
| <i>Phylloneta impressa</i> (L. Koch, 1881)            | 1        | 1   | 1  | 1  | 1  | 1    | 1  | .  | 1  | .  | .  |

| Taxon                                                   | Habitats |     |    |    |    |      |     |    |    |    |    |
|---------------------------------------------------------|----------|-----|----|----|----|------|-----|----|----|----|----|
|                                                         | Ugb      | UgS | GB | GS | AS | OUgS | FE  | BF | FM | WB | HD |
| <i>Robertus arundineti</i> (O. Pickard-Cambridge, 1871) | .        | .   | .  | .  | .  | 1    | .   | .  | .  | .  | .  |
| <i>Robertus lividus</i> (Blackvall, 1836)               | .        | .   | .  | 1  | .  | .    | 1   | .  | .  | .  | .  |
| <i>Steatoda albomaculata</i> (De Geer, 1778)            | .        | .   | 1  | 1  | .  | 1    | 1   | .  | .  | .  | .  |
| <i>Steatoda castanea</i> (Clerck, 1757)                 | .        | .   | .  | .  | .  | .    | .   | .  | .  | .  | 1  |
| <i>Theridion innocuum</i> Thorell, 1875                 | .        | .   | .  | .  | .  | 1    | .   | .  | .  | .  | .  |
| <i>Theridion melanurum</i> Hahn, 1831                   | .        | .   | .  | .  | .  | 1    | .   | .  | .  | .  | .  |
| <i>Theridion varians</i> Hahn, 1833                     | .        | .   | .  | .  | .  | .    | .   | 1  | .  | .  | .  |
| Fam. THOMISIDAE 17                                      |          |     |    |    |    |      |     |    |    |    |    |
| <i>Bassanioides robustus</i> (Hahn, 1832)               | .        | .   | 1  | .  | .  | 1    | .   | .  | .  | .  | .  |
| <i>Cozyptila blackwalli</i> Simon, 1875                 | .        | .   | .  | .  | .  | .    | 1   | .  | .  | .  | .  |
| <i>Ebrechtella tricuspidata</i> (Fabricius, 1775)       | 1        | .   | .  | .  | .  | .    | 1   | 1  | .  | 1  | .  |
| <i>Heriaeus oblongus</i> Simon, 1918                    | .        | 1   | .  | .  | 1  | 1    | .   | .  | .  | .  | .  |
| <i>Misumena vatia</i> (Clerck, 1757)                    | 1        | .   | 1  | .  | 1  | .    | 1   | .  | 1  | 1  | .  |
| <i>Ozyptila claveata</i> (Walckenaer, 1937)             | .        | .   | .  | .  | .  | .    | 1   | .  | .  | .  | .  |
| <i>Ozyptila praticola</i> (C. L. Koch, 1837)            | .        | .   | .  | .  | .  | .    | 1   | 1  | 1  | .  | .  |
| <i>Ozyptila pullata</i> (Thorell, 1875)                 | .        | 1   | .  | .  | .  | .    | .   | .  | .  | .  | .  |
| <i>Ozyptila scabricula</i> (Westring, 1851)             | 1        | 1   | 1  | 1  | 1  | 1    | 1   | .  | 1  | .  | .  |
| <i>Ozyptila trux</i> (Blackwall, 1846)                  | 1        | .   | .  | .  | .  | .    | .   | .  | 1  | 1  | .  |
| <i>Spiracme striatipes</i> L. Koch, 1870                | 1        | 1   | 1  | 1  | 1  | 1    | .   | .  | 1  | .  | .  |
| <i>Thomisus onustus</i> (Walck.)                        | 1        | 1   | 1  | 1  | 1  | 1    | .   | .  | 1  | .  | .  |
| <i>Tmarus piger</i> (Walckenaer, 1802)                  | 1        | .   | .  | .  | .  | .    | 1   | 1  | .  | .  | .  |
| <i>Xysticus cristatus</i> (Clerck, 1757)                | 1        | 1   | 1  | 1  | 1  | 1    | 1   | .  | 1  | 1  | .  |
| <i>Xysticus kochi</i> Thorell, 1872                     | .        | 1   | .  | .  | 1  | 1    | 1   | .  | .  | .  | .  |
| <i>Xysticus luctator</i> L. Koch, 1870                  | .        | .   | .  | .  | .  | .    | 1   | 1  | .  | .  | .  |
| <i>Xysticus ulmi</i> (Hahn, 1831)                       | .        | .   | .  | .  | .  | .    | .   | 1  | 1  | 1  | .  |
| Fam. TITANOECIDAE 2                                     |          |     |    |    |    |      |     |    |    |    |    |
| <i>Titanoeca schineri</i> L. Koch, 1872                 | .        | .   | .  | .  | .  | .    | 1   | .  | .  | .  | .  |
| <i>!Titanoeca veteranica</i> Herman, 1879               | .        | .   | .  | 1  | 1  | .    | .   | .  | .  | .  | .  |
| Fam. ULOBORIDAE 1                                       |          |     |    |    |    |      |     |    |    |    |    |
| <i>Uloborus walckenaerius</i> Latreille, 1806           | .        | 1   | .  | .  | .  | 1    | .   | .  | .  | .  | .  |
| Total number of species                                 | 97       | 77  | 63 | 62 | 75 | 96   | 108 | 73 | 88 | 51 |    |

Abbreviations: UgB – ungrazed gully bottom, UgS – ungrazed gully slope, GB – grazed gully bottom, GS – grazed gully slope, AS – abandoned slope, OUgS – other ungrazed slopes, FE – forest edges, BF – bairak forests, FM – floodplain meadows, WB – banks of waterbodies, HD – human dwelling and outbuildings. The total number of species in a particular family is given after the family name. \* – species listed in the Red Data Book of the Kharkiv Region, !! – species rare in Ukraine, ! – regionally rare species.



**Table S2.** Annual changes in alpha diversity of spider assemblages at the monitoring plots during the study period.

| Study years | Monitoring plots |       |               |       |                |       |              |       |                 |       |
|-------------|------------------|-------|---------------|-------|----------------|-------|--------------|-------|-----------------|-------|
|             | ungrazed bottom  |       | grazed bottom |       | ungrazed slope |       | grazed slope |       | abandoned slope |       |
|             | Sh               | E     | Sh            | E     | Sh             | E     | Sh           | E     | Sh              | E     |
| 2012        | 2.543            | 0.385 | 2.433         | 0.479 | 2.866          | 0.651 | 2.627        | 0.494 | –               | –     |
| 2013        | 2.914            | 0.410 | 2.597         | 0.517 | 2.852          | 0.619 | 2.602        | 0.540 | 2.778           | 0.503 |
| 2014        | 2.462            | 0.326 | –             | –     | 2.549          | 0.609 | 2.311        | 0.593 | 2.485           | 0.462 |
| 2015        | 2.699            | 0.425 | 2.466         | 0.436 | 2.623          | 0.550 | 1.441        | 0.352 | 2.098           | 0.302 |
| 2016        | 2.581            | 0.413 | 1.841         | 0.300 | 2.822          | 0.510 | 2.401        | 0.459 | –               | –     |
| 2017        | 2.671            | 0.452 | 1.353         | 0.168 | 2.775          | 0.553 | –            | –     | 2.314           | 0.421 |
| 2018        | 2.156            | 0.247 | 1.776         | 0.227 | 2.644          | 0.485 | –            | –     | 2.459           | 0.377 |
| 2019        | 2.426            | 0.323 | 2.036         | 0.333 | 2.675          | 0.440 | –            | –     | 2.644           | 0.414 |

Sh – Shannon index, E – Evenness.

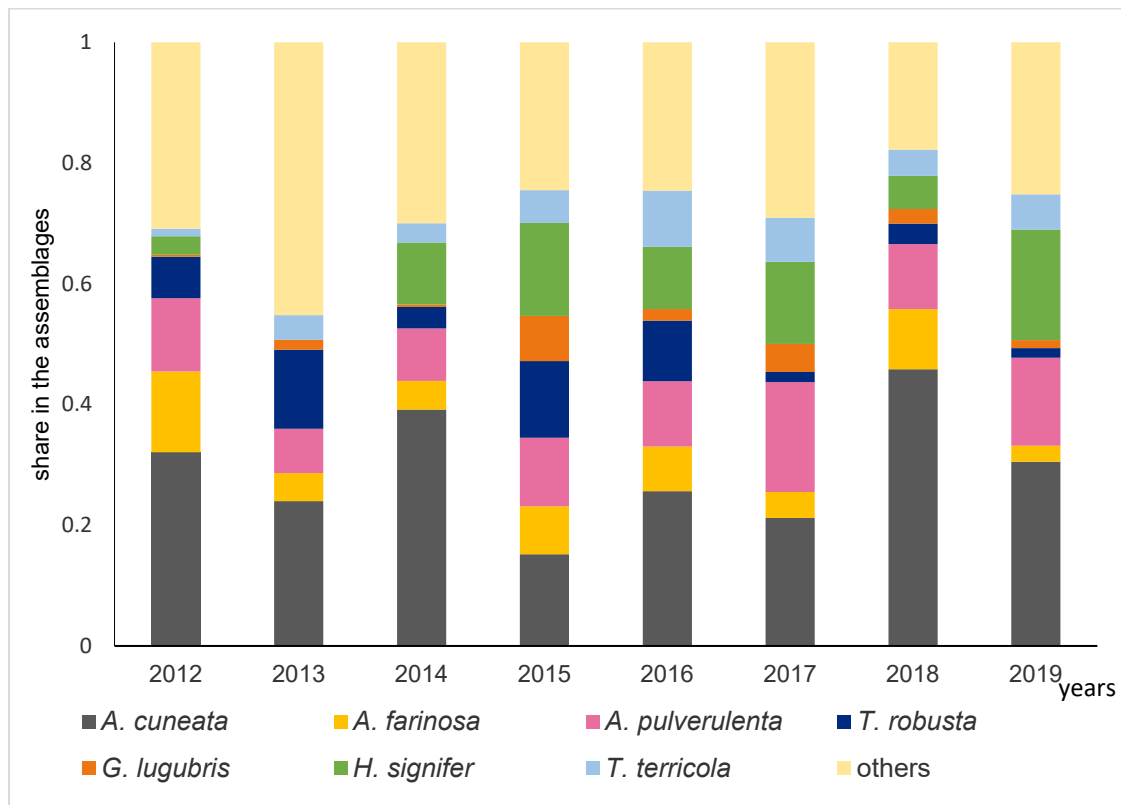

**Figure S1.** Dominant spider complexes in the ungrazed gully bottom (UgB) in the study years

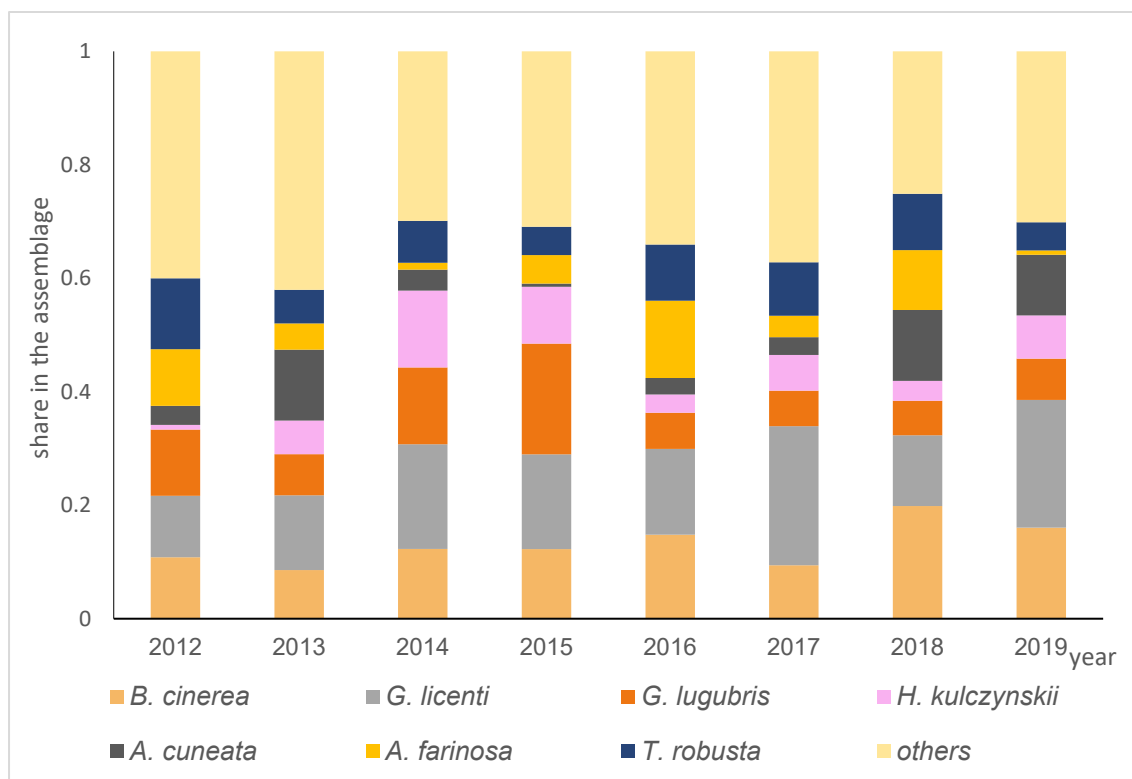

**Figure S2.** Dominant spider complexes on the ungrazed gully slope (UgS) in the study years

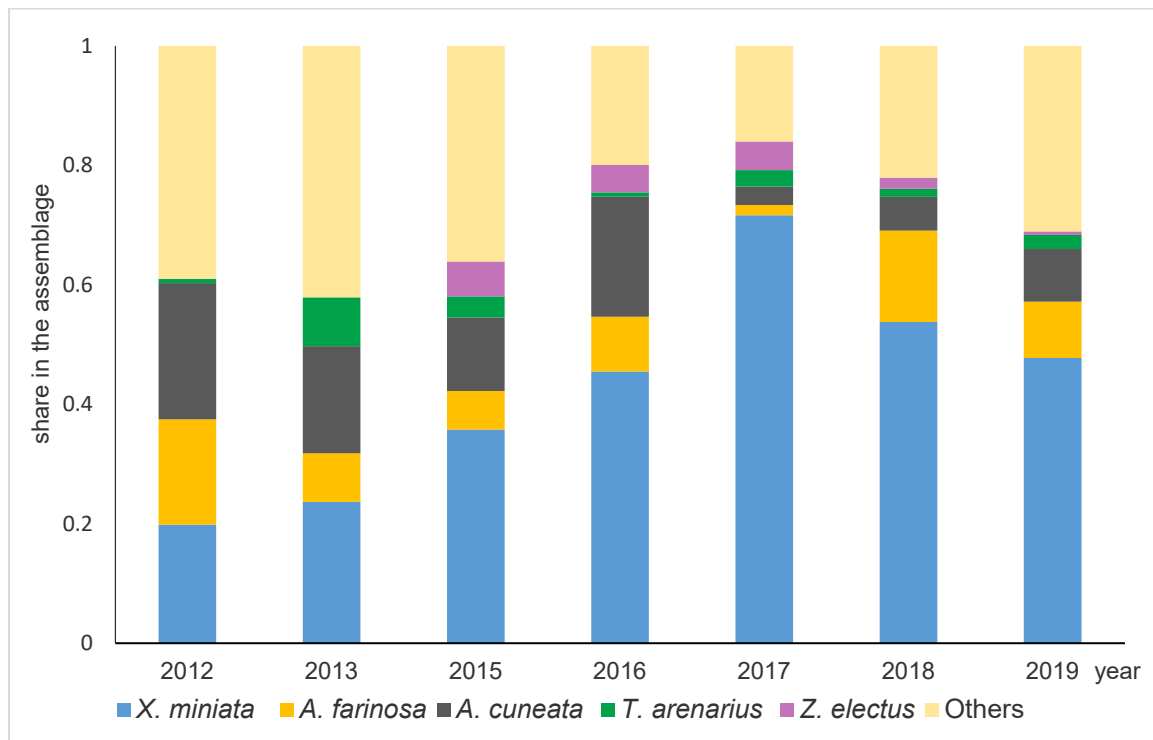

**Figure S3.** Dominant spider complexes in the grazed gully bottom (GB) in the study years

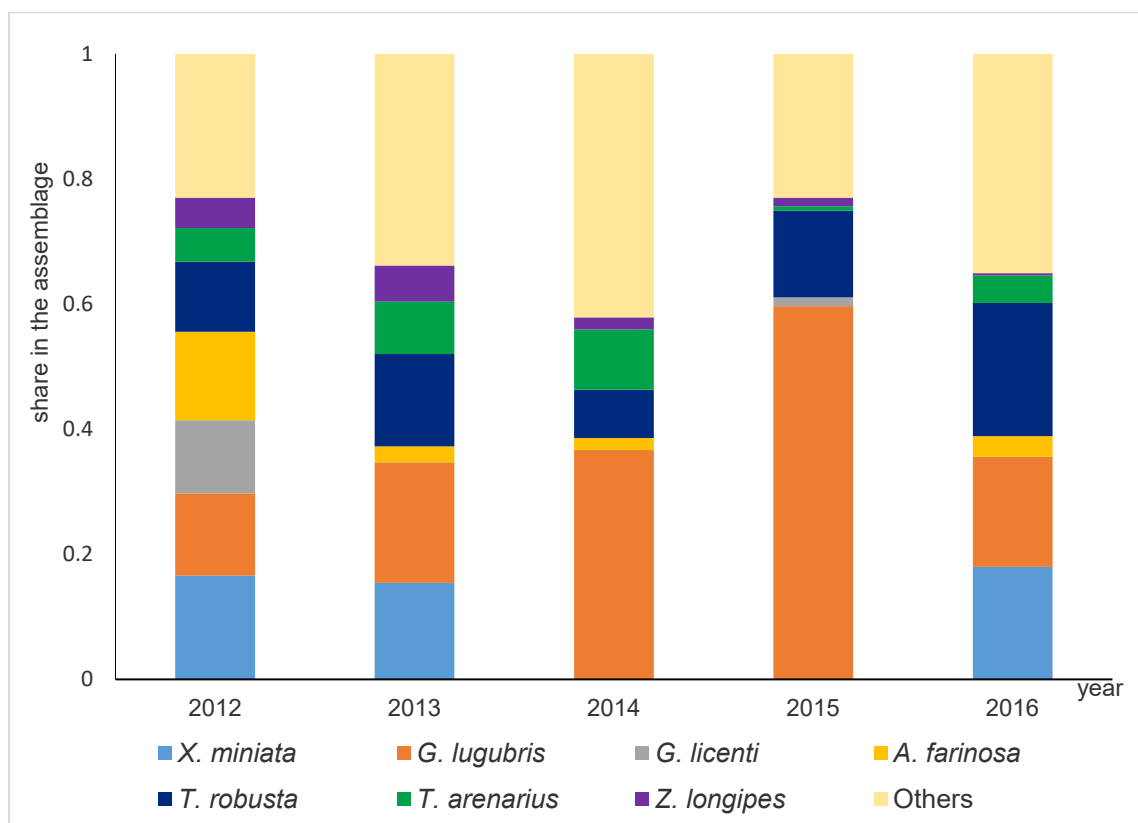

**Figure S4.** Dominant spider complexes on the grazed gully slope (GS) in the study years

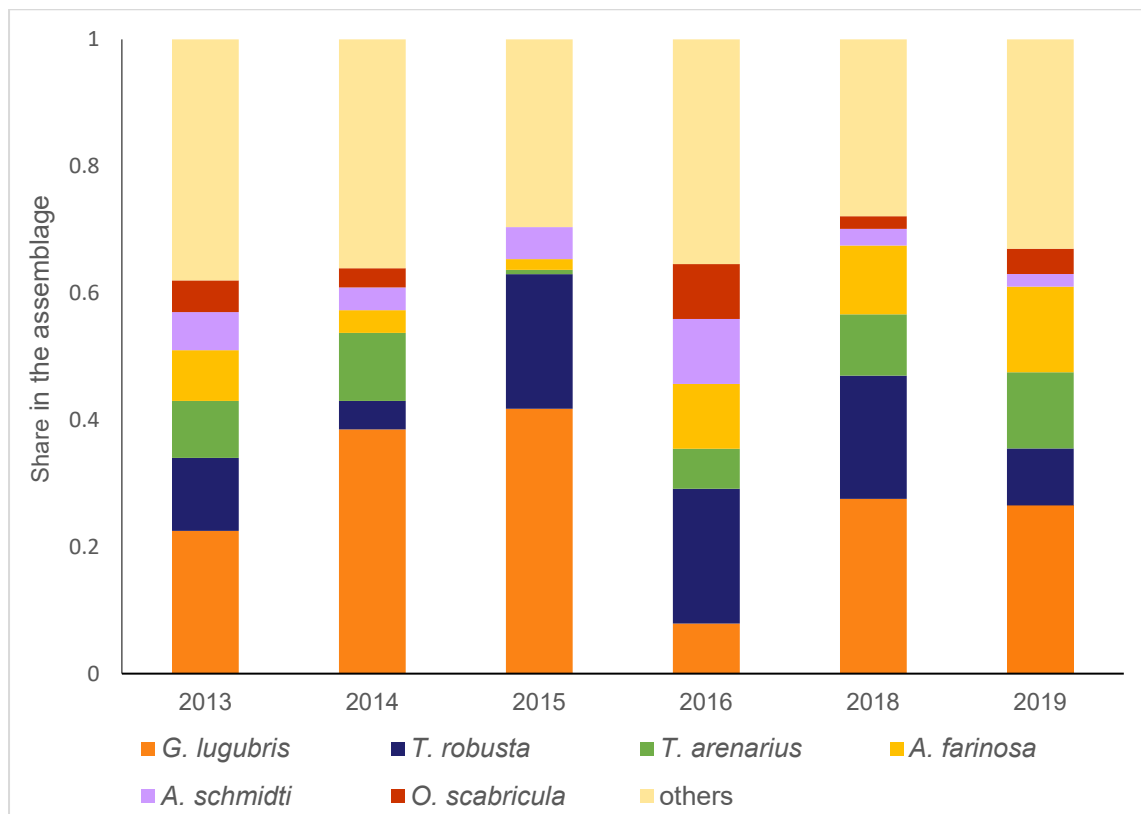

**Figure S5.** Dominant spider complexes on the abandoned gully slope (AS) in the study years

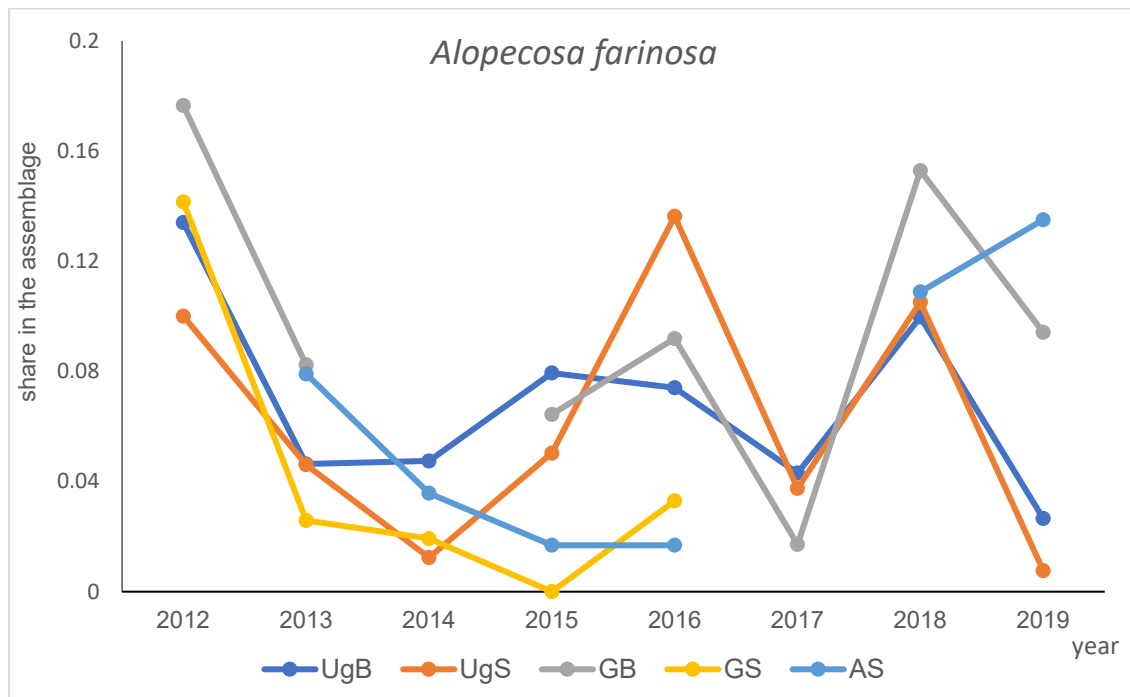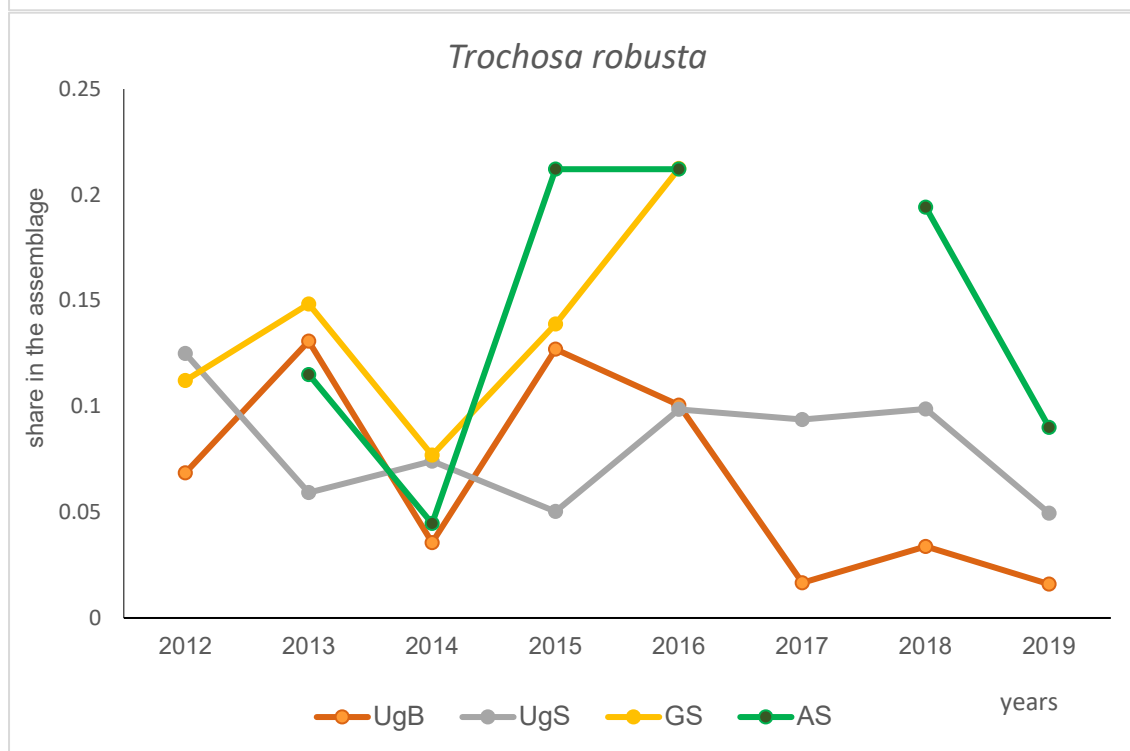

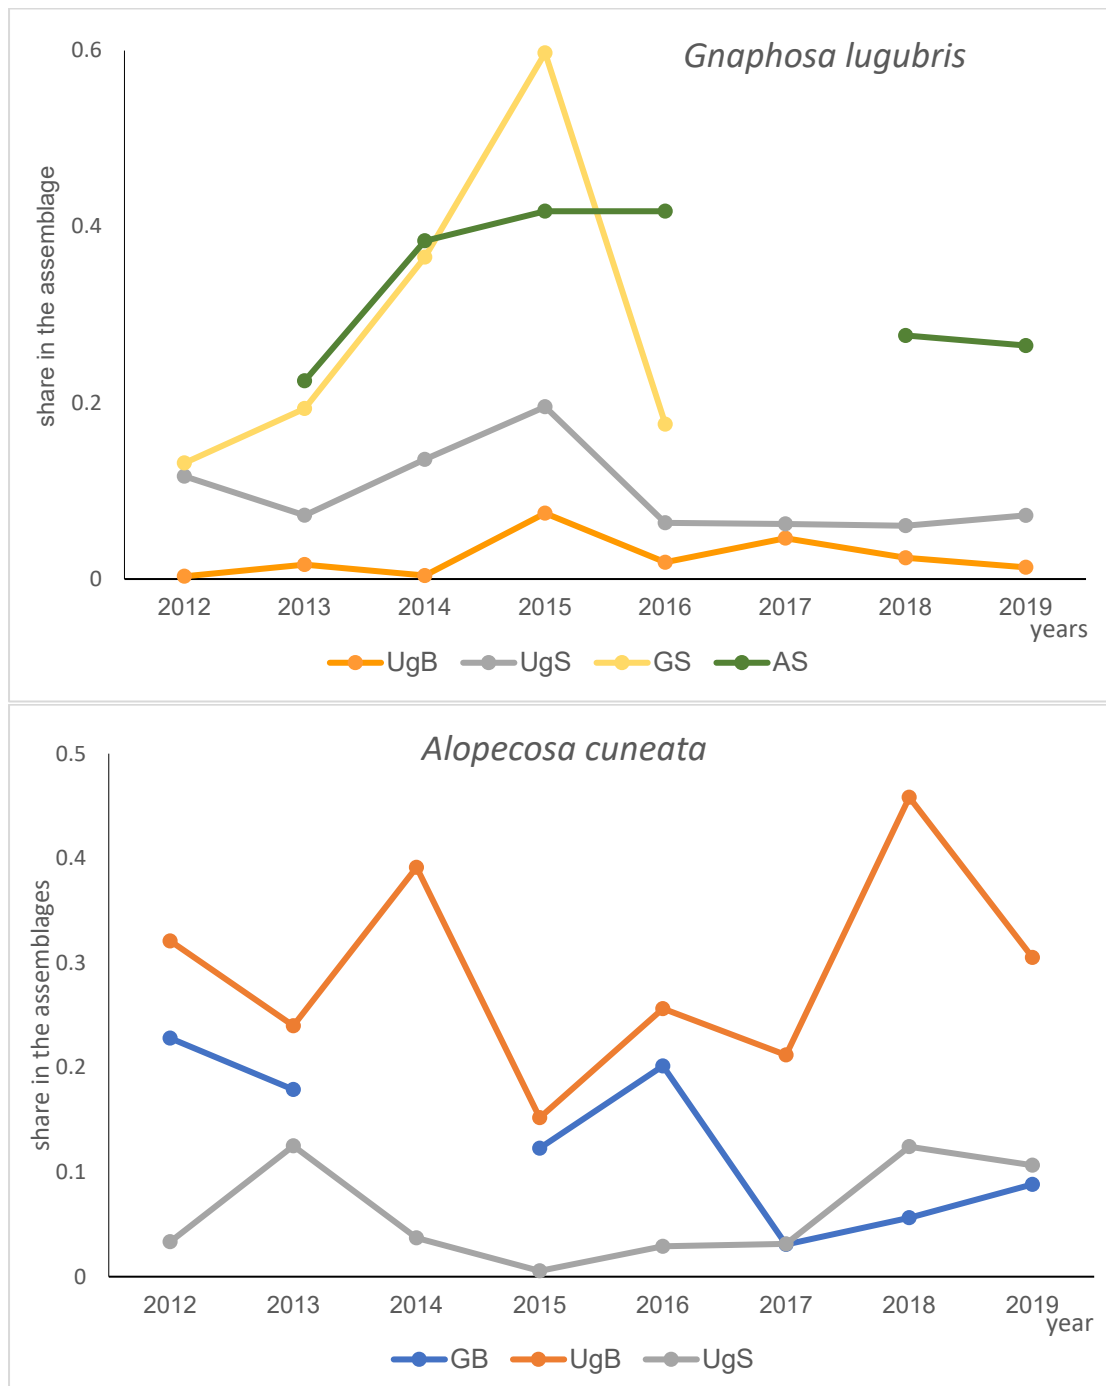

**Figure S6.** Eight-year dynamics of the most numerous spider species at the monitoring plots. For the abbreviations, see Table 1.
